# Supplementary material for: Diagnostic performance of a point-of-care saliva urea nitrogen dipstick to screen for kidney disease in low-resource settings where serum creatinine is unavailable
Source: PubMed Central journal article supplement — BMJ Glob Health. 2020 May 5;5(5):e002312. doi: 10.1136/bmjgh-2020-002312 (PMC7228485; doi:10.1136/bmjgh-2020-002312), 2020-05-05

# Locations of recruitment

## Healthcare facilities

-  Chileka Health Center
-  Bangwe Health Center
-  Chikwawa District Hospital
-  Queen Elizabeth Central Hospital
-  Gateway Clinic

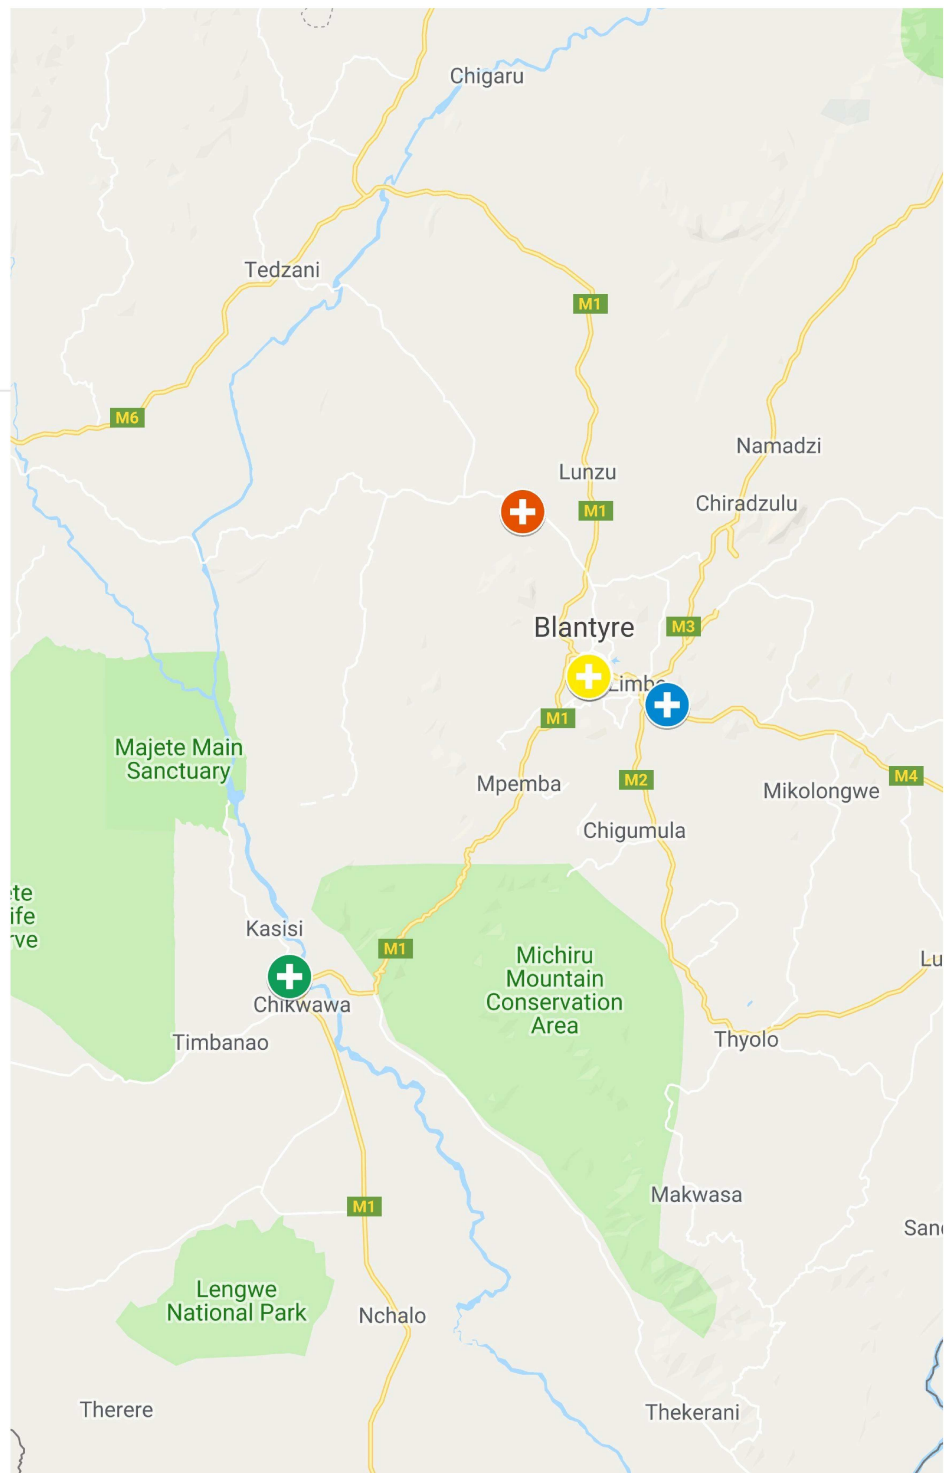

Supplement: bmjgh-2020-002312supp001.pdf [file bmjgh-2020-002312supp001.pdf]
