# Supplementary material for: Diagnostic performance of a point-of-care saliva urea nitrogen dipstick to screen for kidney disease in low-resource settings where serum creatinine is unavailable
Source: PubMed Central journal article supplement — BMJ Glob Health. 2020 May 5;5(5):e002312. doi: 10.1136/bmjgh-2020-002312 (PMC7228485; doi:10.1136/bmjgh-2020-002312), 2020-05-05
Supplement: bmjgh-2020-002312supp002.pdf [file bmjgh-2020-002312supp002.pdf]

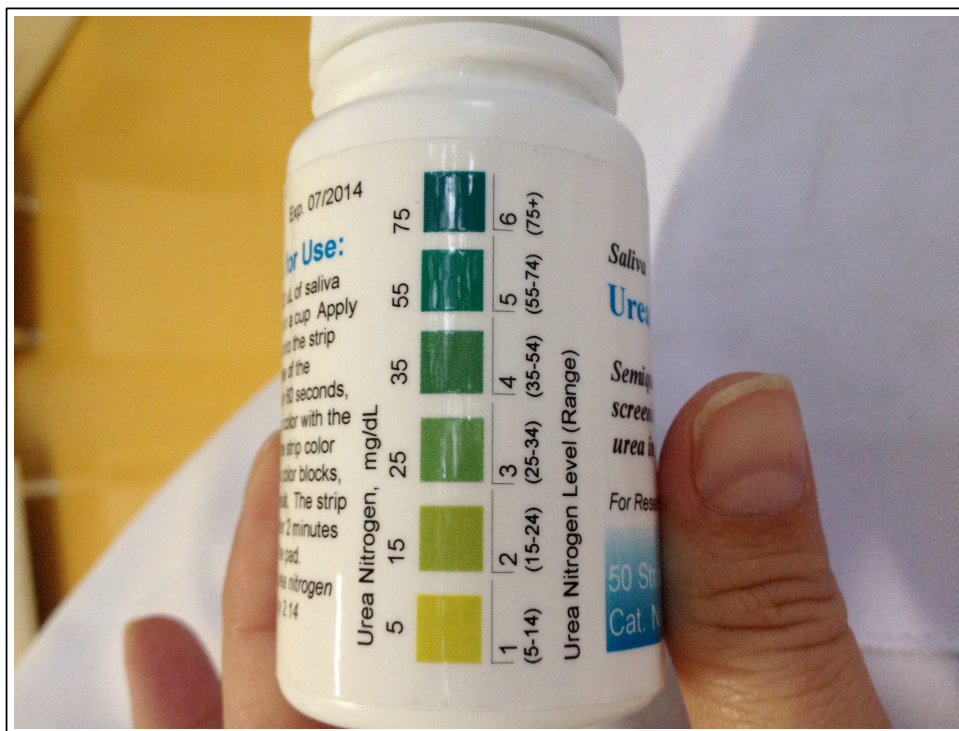

**Supplementary Figure S2:** Saliva Urea Nitrogen (SUN) Dipstick reference pads (#1-6) of increasing urea nitrogen range (in brackets). *The change in colour of the test pad is compared to these reference pads.*
